# Supplementary material for: Targeting the Mannose Receptor with Functionalized Fucoidan/Chitosan Nanoparticles Triggers the Classical Activation of Macrophages
Source: MDPI journal article supplement (doi:10.3390/ijms24129908), 2023-06-08
Supplement: s1 [file s1]

# Targeting mannose receptor with functionalized fucoidan/chitosan nanoparticles triggers the classical activation of macrophages

Filipa Serrasqueiro<sup>1</sup>, Ana Isabel Barbosa<sup>1</sup>, Sofia A. Costa Lima<sup>2,\*</sup>, Salette Reis<sup>1,\*</sup>

## Supplementary data

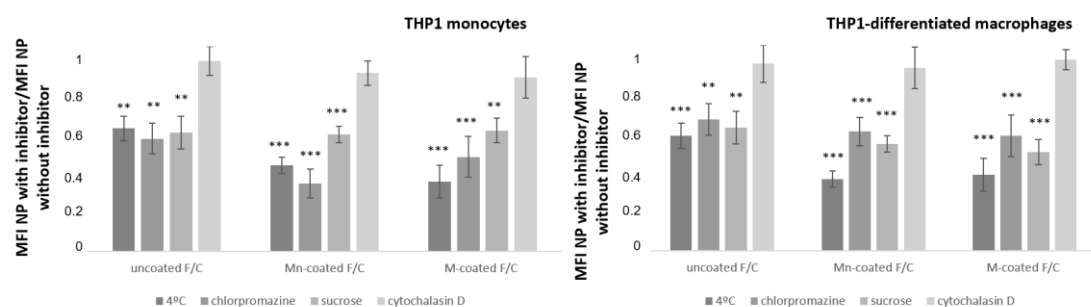

**Figure S1.** Mechanism of internalization of uncoated and sugar-coated F/C nanoparticles. Effect of inhibitors of clathrin-mediated endocytosis (4°C; chlorpromazine and sucrose) and of macropinocytosis (cytochalasin D) upon 1 hour of incubation with THP1 monocytes and differentiated macrophages. MFI – mean fluorescence intensity; NP – nanoparticle; F/C – fucoidan/chitosan; Mn – mannan; M – mannose. \*\*  $p < 0.01$ ; \*\*\*  $p < 0.001$ .

**Table S1.** THP-1-differentiated macrophages secreted cytokines

|                 | IL1 $\beta$ (pg/mL) | IL-6 (pg/mL) | TNF- $\alpha$ (pg/mL) |
|-----------------|---------------------|--------------|-----------------------|
| Untreated cells | 55 $\pm$ 9          | 214 $\pm$ 11 | 235 $\pm$ 9           |
| Mn              | 63 $\pm$ 6          | 240 $\pm$ 19 | 215 $\pm$ 7           |
| M               | 65 $\pm$ 3          | 228 $\pm$ 6  | 198 $\pm$ 9           |

Data represents mean  $\pm$  standard deviation (n=3)
